# Supplementary material
Source: PubMed Central journal article supplement (PMC2234347)
Supplement: 7601974s1.pdf [file 7601974s1.pdf]

**Table 1S**

|                | Protein                                              | Location                                       | Function                                                                                                                                                                                                  | Animal and cellular models                                                                                                                                                                                                              | Disease                                                                                                                                                                            | References                                                                                                                                                                                                                |
|----------------|------------------------------------------------------|------------------------------------------------|-----------------------------------------------------------------------------------------------------------------------------------------------------------------------------------------------------------|-----------------------------------------------------------------------------------------------------------------------------------------------------------------------------------------------------------------------------------------|------------------------------------------------------------------------------------------------------------------------------------------------------------------------------------|---------------------------------------------------------------------------------------------------------------------------------------------------------------------------------------------------------------------------|
| <b>folding</b> | <b>Calnexin (CNX)</b>                                | ER membrane (Cell surface)                     | Chaperone assisting glycoprotein folding, Ca <sup>2+</sup> binding                                                                                                                                        | <i>-/- mice:</i><br>Postnatal death and motor disorders<br><i>-/- cells:</i><br>Similar viability, proliferation rate, morphology and stress levels then wt cells<br>No UPR induction                                                   | Alzheimer disease                                                                                                                                                                  | Okazaki et al., 2000; Denzel et al., 2002; Molinari et al., 2004; Hoshino et al., 2007                                                                                                                                    |
|                | <b>Calreticulin (CRT)</b>                            | ER lumen<br>Cytosol<br>Nucleus                 | Chaperone assisting glycoprotein folding, Ca <sup>2+</sup> binding, Transcriptional regulation                                                                                                            | <i>-/- mice:</i><br>Embryonic lethality at E14.5 due to defective embryonic cardiac development<br><i>-/- cells:</i><br>Similar viability, proliferation rate, morphology and stress levels then wt cells<br>No upr induction           | Cardiac hypertrophy<br>Alzheimer<br>Autoimmune disease                                                                                                                             | Mesaeli et al., 1999; Johnson et al., 2001; Erickson et al., 2005; Afshar et al., 2005; Eggleton and Llewellyn, 1999; Molinari et al., 2004; Kang et al., 2006                                                            |
|                | <b>ERdj1<br/>ERdj2<br/>ERdj3<br/>ERdj4<br/>ERdj5</b> | ER lumen                                       | BiP co-chaperones                                                                                                                                                                                         | <i>-/- cells (RNAi):</i><br>decreased degradation of SS linked glycoproteins (ERdj5)                                                                                                                                                    | Cancer (ERdj5)                                                                                                                                                                     | Cunnea et al., 2003, 2007; Corazzari et al., 2007; Nagata (personal communications)                                                                                                                                       |
|                | <b>ERp57</b>                                         | ER lumen                                       | Oxidoreductase for SS bond catalysis in glycoproteins                                                                                                                                                     | <i>-/- mice:</i><br>lethal<br><i>-/- B cells:</i><br>defective in antigen presentation<br>no UPR induction                                                                                                                              | Prion disease<br>Alzheimer                                                                                                                                                         | Coppiari et al., 2002; Turano et al., 2002; Erickson et al., 2005; Hetz et al., 2005; Garbi et al., 2006; Solda et al., 2006                                                                                              |
|                | <b>ERp72</b>                                         | ER lumen                                       | Oxidoreductase for SS bond catalysis                                                                                                                                                                      | ND                                                                                                                                                                                                                                      | ND                                                                                                                                                                                 | Satoh et al., 2005                                                                                                                                                                                                        |
|                | <b>Ero1<math>\alpha</math></b>                       | ER<br>ERGIC                                    | Oxidative protein folding, recharging of PDI                                                                                                                                                              | <i>Ero1 RNAi in C elegans:</i><br>shortened life span, UPR activation<br><i>Ero1-1 mutant yeast cells:</i><br>defective protein oxidation and PDI oxidation, increased sensitivity to DTT<br><i>Ero1 deleted yeast cells:</i><br>lethal | Cancer<br>Hypoxia<br>Diabetes                                                                                                                                                      | Frand and Kaiser, 1998, 1999; Pollard et al., 1998; Cuozzo and Kaiser, 1999; Chen et al., 2003; Harding et al., 2003; May et al., 2005; Qiang et al., 2007; Wang et al., 2007; Ceppi S. and Sitia R., unpublished results |
|                | <b>Glucosidase I</b>                                 | ER lumen                                       | Glycoprotein quality control N-glycan processing                                                                                                                                                          | <i>-/- cells:</i> Lec23                                                                                                                                                                                                                 | Congenital disorder of glycosylation (CDG-II)                                                                                                                                      | De Praeter et al., 2000; Volker et al., 2002                                                                                                                                                                              |
|                | <b>Glucosidase II</b>                                | ER lumen                                       | Glycoprotein quality control N-glycan processing                                                                                                                                                          | <i>-/- cells:</i><br>Mouse lymphoma cell line Phar 2.7                                                                                                                                                                                  | Autosomal-dominant polycystic liver disease (ADPCLD)                                                                                                                               | Reynolds et al., 2000; Davila et al., 2004; Li et al., 2003; Drenth et al., 2004, 2005                                                                                                                                    |
|                | <b>GRP78 (BiP)</b>                                   | ER lumen (Cell surface)                        | Chaperone<br>Ca <sup>2+</sup> binding<br>ER stress sensor<br>UPR regulator<br>Anti-apoptosis                                                                                                              | <i>-/- mice:</i><br>embryonic lethality at E3.5 due to failure of embryo implantation<br><i>-/- cells:</i><br>non viable                                                                                                                | Cancer<br>Alzheimer<br>Parkinson<br>Prion disease<br>Atherosclerosis                                                                                                               | Kokame et al., 1996; Rao et al., 2002; Hetz et al., 2003; Reddy et al., 2003; Dong et al., 2005; Luo et al., 2006; Li and Lee, 2006; Fu and Lee, 2006                                                                     |
|                | <b>GRP94</b>                                         | ER lumen (Cell surface)                        | Chaperone<br>Ca <sup>2+</sup> binding<br>Anti-apoptosis tumor immunity                                                                                                                                    | <i>-/- mice:</i><br>Embryonic lethality                                                                                                                                                                                                 | Cancer<br>Prion disease<br>Autoimmune disease                                                                                                                                      | Reddy et al., 1999; Fu and Lee, 2006; Hetz et al., 2003; Parmiani et al., 2004; Liu et al., 2005; Fu and Lee, 2006                                                                                                        |
|                | <b>PDI</b>                                           | ER lumen<br>Cell surface<br>Secreted           | Oxidoreductase (catalysis of SS bond formation, isomerization, reduction), chaperone                                                                                                                      | <i>KO mouse model:</i><br>ND<br><i>PDI deleted yeast cells:</i><br>lethal                                                                                                                                                               | Alzheimer<br>Parkinson                                                                                                                                                             | Scherens et al., 1991; Turano et al., 2002; Ellgaard and Ruddock, 2005; Uehara et al., 2006                                                                                                                               |
|                | <b>Sec62</b>                                         | ER membrane                                    | Protein translocation in the ER (part of the Sec61 complex)                                                                                                                                               | ND                                                                                                                                                                                                                                      | Prostate cancer                                                                                                                                                                    | Jung et al., 2006                                                                                                                                                                                                         |
|                | <b>Sec63</b>                                         | ER membrane                                    | Protein translocation in the ER (part of the Sec61 complex)                                                                                                                                               | ND                                                                                                                                                                                                                                      | Autosomal-dominant polycystic liver disease (ADPCLD)<br>Hereditary nonpolyposis colorectal cancer-associated small-bowel cancer<br>Cancer with frequent microsatellite instability | (Mori et al., 2002); (Davila et al., 2004); (Drenth et al., 2005); (Schulmann et al., 2005); (Waanders et al., 2006)                                                                                                      |
|                | <b>Sil1</b>                                          | ER lumen                                       | BiP nucleotide exchange factor                                                                                                                                                                            | <i>Mutant "woozy mice":</i><br>Develop ataxia between 3 and 4 months of age, accompanied by Purkinje cells loss<br>UPR induction in cerebellum before ataxia onset                                                                      | Marinesco-Sjögren syndrome                                                                                                                                                         | Anttonen et al., 2005; Senderek et al., 2005; Zhao et al., 2005; Zoghbi, 2005                                                                                                                                             |
| <b>UGT1</b>    | ER lumen                                             | Glycoprotein quality control<br>Folding sensor | <i>-/- mice:</i><br>Variable phenotype, most mice embryonic lethal at E13, some mice surviving until birth<br><i>-/- MEF:</i><br>Prolonged association of folding-incompetent glycoproteins with calnexin | ND                                                                                                                                                                                                                                      | Molinari et al., 2005; Solda et al., 2007                                                                                                                                          |                                                                                                                                                                                                                           |

|                                      |                                        |                         |                                                                                       |                                                                                                                                                                                                                                                                                                                                                         |                                                                                               |                                                                                                                                                                                                                     |
|--------------------------------------|----------------------------------------|-------------------------|---------------------------------------------------------------------------------------|---------------------------------------------------------------------------------------------------------------------------------------------------------------------------------------------------------------------------------------------------------------------------------------------------------------------------------------------------------|-----------------------------------------------------------------------------------------------|---------------------------------------------------------------------------------------------------------------------------------------------------------------------------------------------------------------------|
| <b>degradation</b>                   | <b>Derlin1<br/>Derlin2<br/>Derlin3</b> | ER membrane             | ERAD (translocon?)                                                                    | ND                                                                                                                                                                                                                                                                                                                                                      | Alzheimer<br>CFTR                                                                             | Sun et al., 2006; Huttunen et al., 2007                                                                                                                                                                             |
|                                      | <b>EDEM1<br/>EDEM2<br/>EDEM3</b>       | ER lumen (and membrane) | ERAD (recognition and targeting misfolded glycosylated proteins to the translocon)    | ND                                                                                                                                                                                                                                                                                                                                                      | ND                                                                                            | Molinari et al., 2003; Olivari and Molinari, 2007                                                                                                                                                                   |
|                                      | <b>HERP</b>                            | ER membrane             | ERAD (ubiquitin-like protein)                                                         | ND                                                                                                                                                                                                                                                                                                                                                      | Alzheimer                                                                                     | Kokame et al., 2000; Sai et al., 2002                                                                                                                                                                               |
|                                      | <b>HRD1</b>                            | ER membrane             | (ERAD) E3 ubiquitin ligase                                                            | <u>Over-expressing mice:</u><br>Spontaneous arthropathy<br><u>+/- mice:</u><br>resistant to collagen-induced arthritis                                                                                                                                                                                                                                  | Parkinson<br>Rheumatoid arthritis<br>Diabetes                                                 | Bordallo et al., 1998; Amano et al., 2003; Allen et al., 2004; Yamasaki et al., 2005; Omura et al., 2006                                                                                                            |
|                                      | <b>SEL1</b>                            | ER membrane             | (ERAD) Capturing ERAD substrates                                                      | ND                                                                                                                                                                                                                                                                                                                                                      | Cancer                                                                                        | Biunno et al., 2000, 2006; Mueller et al., 2006                                                                                                                                                                     |
| <b>transport</b>                     | <b>ERGIC-53 (LMAN 1)</b>               | ERGIC                   | Glycoprotein transport from ER to the Golgi                                           | <u>RNAi cells:</u><br>Lower IgM polymerization<br>MCFD2 secretion                                                                                                                                                                                                                                                                                       | F5F8D                                                                                         | Nichols et al., 1998; Neerman-Arbez et al., 1999; Nyfeler et al., 2006; Mattioli et al., 2006; Anelli et al., 2007; Neerman-Arbez et al., 1999; Nichols et al., 1998; Nyfeler et al., 2006                          |
|                                      | <b>ERp44</b>                           | ERGIC-cisGolgi          | Thiol-mediated retention<br>Quality control of oligomeric proteins<br>IP3R regulation | <u>RNAi cells:</u><br>Lower thiol mediated retention<br>Increased IP3 induced Calcium release<br>No UPR induction                                                                                                                                                                                                                                       | ND                                                                                            | Anelli et al., 2002, 2003, 2007; Higo et al., 2005                                                                                                                                                                  |
| <b>Stress sensing and signalling</b> | <b>ATF6</b>                            | ER membrane<br>Golgi    | ER stress sensor                                                                      | <u>-/- cells:</u><br>suboptimal ER protein processing after ER stress<br>Prolonged UPR activation<br><u>-/- mice:</u><br>Increased toxicity of UPR inducing treatments                                                                                                                                                                                  | Hereditary Hemochromatosis<br>Type II Diabetes                                                | Yoshida et al., 1998; Thameem et al., 2006; Lawless et al., 2007; Meex et al., 2007; Wu et al., 2007                                                                                                                |
|                                      | <b>eIF2<math>\alpha</math></b>         | Cytosolic               | Transcriptional control                                                               | <u>eIF2<math>\alpha</math></u><br><u>S51A/S51A mice:</u><br>embryonic lethal for B cell deficiency and defective glycogen storage and gluconeogenesis<br><u>S51/S51A mice:</u><br>In high fat diet: obese and ER stress, glucose intolerant<br><u>S51A knockin MEFs:</u><br>higher apoptotic sensitivity to hypoxia                                     | Diabetes<br>Tumor progression                                                                 | Brewer and Diehl, 2000; Scheuner et al., 2001, 2005; Bi et al., 2005                                                                                                                                                |
|                                      | <b>IRE1<math>\alpha</math></b>         | ER                      | ER stress sensor, Endonuclease (with broad substrate specificity)                     | <u>-/- mice:</u><br>Embryonic lethal<br><u>-/- haematopoietic cells:</u><br>can differentiate to proB cells but not to Pre B cells<br><u>-/- MEFs:</u><br>No EDEM1 induction after UPR induction (TM)                                                                                                                                                   | Parkinson<br>Alzheimer<br>Hyperhomocysteine mia                                               | Urano et al., 2000; Katayama et al., 2001; Zhang et al., 2001, 2005; Ryu et al., 2002; Hollien and Weissman, 2006; Wu et al., 2007                                                                                  |
|                                      | <b>P58IPK</b>                          | ER membrane             | Negative regulator of eIF2 $\alpha$ (UPR induced)                                     | <u>-/- mice:</u><br>development of diabetes with increased $\beta$ cell death                                                                                                                                                                                                                                                                           | Diabetes (mouse)                                                                              | Tan et al., 1998; Melville et al., 2000; Yan et al., 2002; van Huizen et al., 2003; Ladiges et al., 2005                                                                                                            |
|                                      | <b>PERK</b>                            | ER membrane             | ER stress sensor                                                                      | <u>-/- mice:</u><br>Type II Diabetes<br>Bone abnormalities<br>Small body size<br><u>-/- cells:</u><br>More prone to apoptosis under ER stress<br>Accumulation of endogenous peroxides<br>Lower survival after hypoxia<br>Lower capacity to induce tumors<br><u>Pek1 deleted C.elegans:</u><br>Shortened life span, accumulation of endogenous peroxides | Wollcott Rallison Syndrome<br>Type II diabetes<br>Parkinson<br>Alzheimer<br>Tumor progression | Bi et al., 2005; Delepine et al., 2000; Harding et al., 2001; Harding et al., 2000; Harding et al., 2003; Koumenis et al., 2002; Hoozemans et al., 2005, 2007; Koumenis and Wouters, 2006; Unterberger et al., 2006 |
|                                      | <b>XBP1</b>                            | Cytosolic<br>Nuclear    | UPR effector (transcription factor in the form sXbp1)                                 | <u>-/- mice:</u><br>embryonic lethal<br><u>+/- mice:</u><br>insulin resistance and type II diabetes on high fat diet<br><u>-/- lymphocytes:</u><br>cannot differentiate to plasma cells<br><u>-/- MEF:</u><br>more sensitive to hypoxia (= more apoptosis)<br><u>-/- cells:</u><br>Cannot form tumors in mice                                           | Multiple myeloma                                                                              | Wen et al., 1999; Ozcan et al., 2004; Reimold et al., 2000; Reimold et al., 2001; Romero-Ramirez et al., 2004; Carrasco et al., 2007                                                                                |

## References

- Afshar, N., Black, B.E. and Paschal, B.M. (2005) Retrotranslocation of the chaperone calreticulin from the endoplasmic reticulum lumen to the cytosol. *Mol Cell Biol*, **25**, 8844-8853.
- Allen, J.R., Nguyen, L.X., Sargent, K.E., Lipson, K.L., Hackett, A. and Urano, F. (2004) High ER stress in beta-cells stimulates intracellular degradation of misfolded insulin. *Biochem Biophys Res Commun*, **324**, 166-170.
- Amano, T., Yamasaki, S., Yagishita, N., Tsuchimochi, K., Shin, H., Kawahara, K., Aratani, S., Fujita, H., Zhang, L., Ikeda, R., Fujii, R., Miura, N., Komiya, S., Nishioka, K., Maruyama, I., Fukamizu, A. and Nakajima, T. (2003) Synoviolin/Hrd1, an E3 ubiquitin ligase, as a novel pathogenic factor for arthropathy. *Genes Dev*, **17**, 2436-2449.
- Anelli, T., Ceppi, S., Bergamelli, L., Cortini, M., Masciarelli, S., Valetti, C. and Sitia, R. (2007) Sequential steps and checkpoints in the early exocytic compartment during secretory IgM biogenesis. *Embo J*.
- Anttonen, A.K., Mahjneh, I., Hamalainen, R.H., Lagier-Tourenne, C., Kopra, O., Waris, L., Anttonen, M., Joensuu, T., Kalimo, H., Paetau, A., Tranebjaerg, L., Chaigne, D., Koenig, M., Eeg-Olofsson, O., Udd, B., Somer, M., Somer, H. and Lehesjoki, A.E. (2005) The gene disrupted in Marinesco-Sjogren syndrome encodes SIL1, an HSPA5 cochaperone. *Nat Genet*, **37**, 1309-1311.
- Bi, M., Naczki, C., Koritzinsky, M., Fels, D., Blais, J., Hu, N., Harding, H., Novoa, I., Varia, M., Raleigh, J., Scheuner, D., Kaufman, R.J., Bell, J., Ron, D., Wouters, B.G. and Koumenis, C. (2005) ER stress-regulated translation increases tolerance to extreme hypoxia and promotes tumor growth. *Embo J*, **24**, 3470-3481.
- Biunno, I., Bernard, L., Dear, P., Cattaneo, M., Volorio, S., Zannini, L., Bankier, A. and Zollo, M. (2000) SEL1L, the human homolog of *C. elegans* sel-1: refined physical mapping, gene structure and identification of polymorphic markers. *Hum Genet*, **106**, 227-235.
- Bordallo, J., Plemper, R.K., Finger, A. and Wolf, D.H. (1998) Der3p/Hrd1p is required for endoplasmic reticulum-associated degradation of misfolded luminal and integral membrane proteins. *Mol Biol Cell*, **9**, 209-222.
- Brewer, J.W. and Diehl, J.A. (2000) PERK mediates cell-cycle exit during the mammalian unfolded protein response. *Proc Natl Acad Sci U S A*, **97**, 12625-12630.
- Carrasco, D.R., Sukhdeo, K., Protopopova, M., Sinha, R., Enos, M., Carrasco, D.E., Zheng, M., Mani, M., Henderson, J., Pinkus, G.S., Munshi, N., Horner, J., Ivanova, E.V., Protopopov, A., Anderson, K.C., Tonon, G. and DePinho, R.A. (2007) The differentiation and stress response factor XBP-1 drives multiple myeloma pathogenesis. *Cancer Cell*, **11**, 349-360.
- Chen, D., Jin, K., Kawaguchi, K., Nakayama, M., Zhou, X., Xiong, Z., Zhou, A., Mao, X.O., Greenberg, D.A., Graham, S.H. and Simon, R.P. (2003) Ero1-L, an ischemia-inducible gene from rat brain with homology to global ischemia-induced gene 11 (Giig11), is localized to neuronal dendrites by a dispersed identifier (ID) element-dependent mechanism. *J Neurochem*, **85**, 670-679.
- Coppari, S., Altieri, F., Ferraro, A., Chichiarelli, S., Eufemi, M. and Turano, C. (2002) Nuclear localization and DNA interaction of protein disulfide isomerase ERp57 in mammalian cells. *J Cell Biochem*, **85**, 325-333.
- Corazzari, M., Lovat, P.E., Armstrong, J.L., Fimia, G.M., Hill, D.S., Birch-Machin, M., Redfern, C.P. and Piacentini, M. (2007) Targeting homeostatic mechanisms of endoplasmic reticulum stress to increase susceptibility of cancer cells to fenretinide-induced apoptosis: the role of stress proteins ERdj5 and ERp57. *Br J Cancer*, **96**, 1062-1071.
- Cunnea, P.M., Miranda-Vizuete, A., Bertoli, G., Simmen, T., Damdimopoulos, A.E., Hermann, S., Leinonen, S., Huikko, M.P., Gustafsson, J.A., Sitia, R. and Spyrou, G. (2003) ERdj5, an endoplasmic reticulum (ER)-resident protein containing DnaJ and thioredoxin domains, is expressed in secretory cells or following ER stress. *J Biol Chem*, **278**, 1059-1066.
- Cuozzo, J.W. and Kaiser, C.A. (1999) Competition between glutathione and protein thiols for disulphide-bond formation. *Nat Cell Biol*, **1**, 130-135.
- Davila, S., Furu, L., Gharavi, A.G., Tian, X., Onoe, T., Qian, Q., Li, A., Cai, Y., Kamath, P.S., King, B.F., Azurmendi, P.J., Tahvanainen, P., Kaariainen, H., Hockerstedt, K., Devuyst, O., Pirson, Y., Martin, R.S., Lifton, R.P., Tahvanainen, E., Torres, V.E. and Somlo, S. (2004) Mutations in SEC63 cause autosomal dominant polycystic liver disease. *Nat Genet*, **36**, 575-577.
- De Praeter, C.M., Gerwig, G.J., Bause, E., Nuytinck, L.K., Vliegthart, J.F., Breuer, W., Kamerling, J.P., Espeel, M.F., Martin, J.J., De Paepe, A.M., Chan, N.W., Dacremont, G.A. and Van Coster, R.N. (2000) A novel disorder caused by defective biosynthesis of N-linked oligosaccharides due to glucosidase I deficiency. *Am J Hum Genet*, **66**, 1744-1756.
- Delepine, M., Nicolino, M., Barrett, T., Golamaully, M., Lathrop, G.M. and Julier, C. (2000) EIF2AK3, encoding translation initiation factor 2-alpha kinase 3, is mutated in patients with Wolcott-Rallison syndrome. *Nat Genet*, **25**, 406-409.
- Denzel, A., Molinari, M., Trigueros, C., Martin, J.E., Velmurgan, S., Brown, S., Stamp, G. and Owen, M.J. (2002) Early postnatal death and motor disorders in mice congenitally deficient in calnexin expression. *Mol Cell Biol*, **22**, 7398-7404.
- Dong, D., Ko, B., Baumeister, P., Swenson, S., Costa, F., Markland, F., Stiles, C., Patterson, J.B., Bates, S.E. and Lee, A.S. (2005) Vascular targeting and angiogenesis agents induce drug resistance effector GRP78 within the tumor microenvironment. *Cancer Res*, **65**, 5785-5791.
- Drenth, J.P., Martina, J.A., Te Morsche, R.H., Jansen, J.B. and Bonifacino, J.S. (2004) Molecular characterization of hepatocystin, the protein that is defective in autosomal dominant polycystic liver disease. *Gastroenterology*, **126**, 1819-1827.

- Drenth, J.P., Martina, J.A., van de Kerkhof, R., Bonifacino, J.S. and Jansen, J.B. (2005) Polycystic liver disease is a disorder of cotranslational protein processing. *Trends Mol Med*, **11**, 37-42.
- Eggleton, P. and Llewellyn, D.H. (1999) Pathophysiological roles of calreticulin in autoimmune disease. *Scand J Immunol*, **49**, 466-473.
- Ellgaard, L. and Ruddock, L.W. (2005) The human protein disulphide isomerase family: substrate interactions and functional properties. *EMBO Rep*, **6**, 28-32.
- Erickson, R.R., Dunning, L.M., Olson, D.A., Cohen, S.J., Davis, A.T., Wood, W.G., Kratzke, R.A. and Holtzman, J.L. (2005) In cerebrospinal fluid ER chaperones ERp57 and calreticulin bind beta-amyloid. *Biochem Biophys Res Commun*, **332**, 50-57.
- Frand, A.R. and Kaiser, C.A. (1998) The ERO1 gene of yeast is required for oxidation of protein dithiols in the endoplasmic reticulum. *Mol Cell*, **1**, 161-170.
- Fu, Y. and Lee, A.S. (2006) Glucose regulated proteins in cancer progression, drug resistance and immunotherapy. *Cancer Biol Ther*, **5**, 741-744.
- Garbi, N., Tanaka, S., Momburg, F. and Hammerling, G.J. (2006) Impaired assembly of the major histocompatibility complex class I peptide-loading complex in mice deficient in the oxidoreductase ERp57. *Nat Immunol*, **7**, 93-102.
- Harding, H.P., Zeng, H., Zhang, Y., Jungries, R., Chung, P., Plesken, H., Sabatini, D.D. and Ron, D. (2001) Diabetes mellitus and exocrine pancreatic dysfunction in *perk*<sup>-/-</sup> mice reveals a role for translational control in secretory cell survival. *Mol Cell*, **7**, 1153-1163.
- Harding, H.P., Zhang, Y., Bertolotti, A., Zeng, H. and Ron, D. (2000) Perk is essential for translational regulation and cell survival during the unfolded protein response. *Mol Cell*, **5**, 897-904.
- Harding, H.P., Zhang, Y., Zeng, H., Novoa, I., Lu, P.D., Calton, M., Sadri, N., Yun, C., Popko, B., Paules, R., Stojdl, D.F., Bell, J.C., Hettmann, T., Leiden, J.M. and Ron, D. (2003) An integrated stress response regulates amino acid metabolism and resistance to oxidative stress. *Mol Cell*, **11**, 619-633.
- Hetz, C., Russelakis-Carneiro, M., Maundrell, K., Castilla, J. and Soto, C. (2003) Caspase-12 and endoplasmic reticulum stress mediate neurotoxicity of pathological prion protein. *Embo J*, **22**, 5435-5445.
- Hetz, C., Russelakis-Carneiro, M., Walchli, S., Carboni, S., Vial-Knecht, E., Maundrell, K., Castilla, J. and Soto, C. (2005) The disulfide isomerase Grp58 is a protective factor against prion neurotoxicity. *J Neurosci*, **25**, 2793-2802.
- Higo, T., Hattori, M., Nakamura, T., Natsume, T., Michikawa, T. and Mikoshiba, K. (2005) Subtype-specific and ER lumenal environment-dependent regulation of inositol 1,4,5-trisphosphate receptor type 1 by ERp44. *Cell*, **120**, 85-98.
- Hollien, J. and Weissman, J.S. (2006) Decay of endoplasmic reticulum-localized mRNAs during the unfolded protein response. *Science*, **313**, 104-107.
- Hoshino, T., Nakaya, T., Araki, W., Suzuki, K., Suzuki, T. and Mizushima, T. (2007) Endoplasmic reticulum chaperones inhibit the production of amyloid-beta peptides. *Biochem J*, **402**, 581-589.
- Huttunen, H.J., Guenette, S.Y., Peach, C., Greco, C., Xia, W., Kim, D.Y., Barren, C., Tanzi, R.E. and Kovacs, D.M. (2007) HtrA2 Regulates beta-Amyloid Precursor Protein (APP) Metabolism through Endoplasmic Reticulum-associated Degradation. *J Biol Chem*, **282**, 28285-28295.
- Johnson, S., Michalak, M., Opas, M. and Eggleton, P. (2001) The ins and outs of calreticulin: from the ER lumen to the extracellular space. *Trends Cell Biol*, **11**, 122-129.
- Jung, V., Kindich, R., Kamradt, J., Jung, M., Muller, M., Schulz, W.A., Engers, R., Unteregger, G., Stockle, M., Zimmermann, R. and Wullich, B. (2006) Genomic and expression analysis of the 3q25-q26 amplification unit reveals TLOC1/SEC62 as a probable target gene in prostate cancer. *Mol Cancer Res*, **4**, 169-176.
- Kang, S.W., Rane, N.S., Kim, S.J., Garrison, J.L., Taunton, J. and Hegde, R.S. (2006) Substrate-specific translocational attenuation during ER stress defines a pre-emptive quality control pathway. *Cell*, **127**, 999-1013.
- Katayama, T., Imaizumi, K., Honda, A., Yoneda, T., Kudo, T., Takeda, M., Mori, K., Rozmahel, R., Fraser, P., George-Hyslop, P.S. and Tohyama, M. (2001) Disturbed activation of endoplasmic reticulum stress transducers by familial Alzheimer's disease-linked presenilin-1 mutations. *J Biol Chem*, **276**, 43446-43454.
- Kokame, K., Agarwala, K.L., Kato, H. and Miyata, T. (2000) Herp, a new ubiquitin-like membrane protein induced by endoplasmic reticulum stress. *J Biol Chem*, **275**, 32846-32853.
- Kokame, K., Kato, H. and Miyata, T. (1996) Homocysteine-responsive genes in vascular endothelial cells identified by differential display analysis. GRP78/BiP and novel genes. *J Biol Chem*, **271**, 29659-29665.
- Koumenis, C., Naczki, C., Koritzinsky, M., Rastani, S., Diehl, A., Sonenberg, N., Koromilas, A. and Wouters, B.G. (2002) Regulation of protein synthesis by hypoxia via activation of the endoplasmic reticulum kinase PERK and phosphorylation of the translation initiation factor eIF2alpha. *Mol Cell Biol*, **22**, 7405-7416.
- Koumenis, C. and Wouters, B.G. (2006) "Translating" tumor hypoxia: unfolded protein response (UPR)-dependent and UPR-independent pathways. *Mol Cancer Res*, **4**, 423-436.

- Ladiges, W.C., Knoblaugh, S.E., Morton, J.F., Korth, M.J., Sopher, B.L., Baskin, C.R., MacAuley, A., Goodman, A.G., LeBoeuf, R.C. and Katze, M.G. (2005) Pancreatic beta-cell failure and diabetes in mice with a deletion mutation of the endoplasmic reticulum molecular chaperone gene P58IPK. *Diabetes*, **54**, 1074-1081.
- Lawless, M.W., Mankan, A.K., White, M., O'Dwyer, M.J. and Norris, S. (2007) Expression of hereditary hemochromatosis C282Y HFE protein in HEK293 cells activates specific endoplasmic reticulum stress responses. *BMC Cell Biol*, **8**, 30.
- Li, A., Davila, S., Furu, L., Qian, Q., Tian, X., Kamath, P.S., King, B.F., Torres, V.E. and Somlo, S. (2003) Mutations in PRKCSH cause isolated autosomal dominant polycystic liver disease. *Am J Hum Genet*, **72**, 691-703.
- Li, J. and Lee, A.S. (2006) Stress induction of GRP78/BiP and its role in cancer. *Curr Mol Med*, **6**, 45-54.
- Liu, S., Wang, H., Yang, Z., Kon, T., Zhu, J., Cao, Y., Li, F., Kirkpatrick, J., Nicchitta, C.V. and Li, C.Y. (2005) Enhancement of cancer radiation therapy by use of adenovirus-mediated secretable glucose-regulated protein 94/gp96 expression. *Cancer Res*, **65**, 9126-9131.
- Luo, S., Mao, C., Lee, B. and Lee, A.S. (2006) GRP78/BIP is required for cell proliferation and protecting the inner cell mass from apoptosis during early mouse embryonic development. *Mol Cell Biol*, **26**, 5688-5697.
- Mattioli, L., Anelli, T., Fagioli, C., Tacchetti, C., Sitia, R. and Valetti, C. (2006) ER storage diseases: a role for ERGIC-53 in controlling the formation and shape of Russell bodies. *J Cell Sci*, **119**, 2532-2541.
- May, D., Itin, A., Gal, O., Kalinski, H., Feinstein, E. and Keshet, E. (2005) Ero1-L alpha plays a key role in a HIF-1-mediated pathway to improve disulfide bond formation and VEGF secretion under hypoxia: implication for cancer. *Oncogene*, **24**, 1011-1020.
- Meex, S.J., van Greevenbroek, M.M., Ayoubi, T.A., Vlietinck, R., van Vliet-Ostapchouk, J.V., Hofker, M.H., Vermeulen, V.M., Schalkwijk, C.G., Feskens, E.J., Boer, J.M., Stehouwer, C.D., van der Kallen, C.J. and de Bruin, T.W. (2007) Activating transcription factor 6 polymorphisms and haplotypes are associated with impaired glucose homeostasis and type 2 diabetes in Dutch Caucasians. *J Clin Endocrinol Metab*, **92**, 2720-2725.
- Melville, M.W., Katze, M.G. and Tan, S.L. (2000) P58IPK, a novel cochaperone containing tetratricopeptide repeats and a J-domain with oncogenic potential. *Cell Mol Life Sci*, **57**, 311-322.
- Mesaeli, N., Nakamura, K., Zvaritch, E., Dickie, P., Dziak, E., Krause, K.H., Opas, M., MacLennan, D.H. and Michalak, M. (1999) Calreticulin is essential for cardiac development. *J Cell Biol*, **144**, 857-868.
- Molinari, M., Calanca, V., Galli, C., Lucca, P. and Paganetti, P. (2003) Role of EDEM in the release of misfolded glycoproteins from the calnexin cycle. *Science*, **299**, 1397-1400.
- Molinari, M., Eriksson, K.K., Calanca, V., Galli, C., Cresswell, P., Michalak, M. and Helenius, A. (2004) Contrasting functions of calreticulin and calnexin in glycoprotein folding and ER quality control. *Mol Cell*, **13**, 125-135.
- Molinari, M., Galli, C., Vanoni, O., Arnold, S.M. and Kaufman, R.J. (2005) Persistent glycoprotein misfolding activates the glucosidase II/UGT1-driven calnexin cycle to delay aggregation and loss of folding competence. *Mol Cell*, **20**, 503-512.
- Mori, Y., Sato, F., Selaru, F.M., Oлару, A., Perry, K., Kimos, M.C., Tamura, G., Matsubara, N., Wang, S., Xu, Y., Yin, J., Zou, T.T., Leggett, B., Young, J., Nukiwa, T., Stine, O.C., Abraham, J.M., Shibata, D. and Meltzer, S.J. (2002) Instability typing reveals unique mutational spectra in microsatellite-unstable gastric cancers. *Cancer Res*, **62**, 3641-3645.
- Mueller, B., Lilley, B.N. and Ploegh, H.L. (2006) SEL1L, the homologue of yeast Hrd3p, is involved in protein dislocation from the mammalian ER. *J Cell Biol*, **175**, 261-270.
- Neerman-Arbez, M., Johnson, K.M., Morris, M.A., McVey, J.H., Peyvandi, F., Nichols, W.C., Ginsburg, D., Rossier, C., Antonarakis, S.E. and Tuddenham, E.G. (1999) Molecular analysis of the ERGIC-53 gene in 35 families with combined factor V-factor VIII deficiency. *Blood*, **93**, 2253-2260.
- Nichols, W.C., Seligsohn, U., Zivelin, A., Terry, V.H., Hertel, C.E., Wheatley, M.A., Moussalli, M.J., Hauri, H.P., Ciavarella, N., Kaufman, R.J. and Ginsburg, D. (1998) Mutations in the ER-Golgi intermediate compartment protein ERGIC-53 cause combined deficiency of coagulation factors V and VIII. *Cell*, **93**, 61-70.
- Nyfeler, B., Zhang, B., Ginsburg, D., Kaufman, R.J. and Hauri, H.P. (2006) Cargo selectivity of the ERGIC-53/MCFD2 transport receptor complex. *Traffic*, **7**, 1473-1481.
- Okazaki, Y., Ohno, H., Takase, K., Ochiai, T. and Saito, T. (2000) Cell surface expression of calnexin, a molecular chaperone in the endoplasmic reticulum. *J Biol Chem*, **275**, 35751-35758.
- Olivari, S. and Molinari, M. (2007) Glycoprotein folding and the role of EDEM1, EDEM2 and EDEM3 in degradation of folding-defective glycoproteins. *FEBS Lett*, **581**, 3658-3664.
- Omura, T., Kaneko, M., Okuma, Y., Orba, Y., Nagashima, K., Takahashi, R., Fujitani, N., Matsumura, S., Hata, A., Kubota, K., Murahashi, K., Uehara, T. and Nomura, Y. (2006) A ubiquitin ligase HRD1 promotes the degradation of Pael receptor, a substrate of Parkin. *J Neurochem*, **99**, 1456-1469.
- Ozcan, U., Cao, Q., Yilmaz, E., Lee, A.H., Iwakoshi, N.N., Ozdelen, E., Tuncman, G., Gorgun, C., Glimcher, L.H. and Hotamisligil, G.S. (2004) Endoplasmic reticulum stress links obesity, insulin action, and type 2 diabetes. *Science*, **306**, 457-461.

- Parmiani, G., Testori, A., Maio, M., Castelli, C., Rivoltini, L., Pilla, L., Belli, F., Mazzaferro, V., Coppa, J., Patuzzo, R., Sertoli, M.R., Hoos, A., Srivastava, P.K. and Santinami, M. (2004) Heat shock proteins and their use as anticancer vaccines. *Clin Cancer Res*, **10**, 8142-8146.
- Pollard, M.G., Travers, K.J. and Weissman, J.S. (1998) Ero1p: a novel and ubiquitous protein with an essential role in oxidative protein folding in the endoplasmic reticulum. *Mol Cell*, **1**, 171-182.
- Qiang, L., Wang, H. and Farmer, S.R. (2007) Adiponectin secretion is regulated by SIRT1 and the endoplasmic reticulum oxidoreductase Ero1-L alpha. *Mol Cell Biol*, **27**, 4698-4707.
- Rao, R.V., Peel, A., Logvinova, A., del Rio, G., Hermel, E., Yokota, T., Goldsmith, P.C., Ellerby, L.M., Ellerby, H.M. and Bredesen, D.E. (2002) Coupling endoplasmic reticulum stress to the cell death program: role of the ER chaperone GRP78. *FEBS Lett*, **514**, 122-128.
- Reddy, R.K., Lu, J. and Lee, A.S. (1999) The endoplasmic reticulum chaperone glycoprotein GRP94 with Ca(2+)-binding and antiapoptotic properties is a novel proteolytic target of calpain during etoposide-induced apoptosis. *J Biol Chem*, **274**, 28476-28483.
- Reddy, R.K., Mao, C., Baumeister, P., Austin, R.C., Kaufman, R.J. and Lee, A.S. (2003) Endoplasmic reticulum chaperone protein GRP78 protects cells from apoptosis induced by topoisomerase inhibitors: role of ATP binding site in suppression of caspase-7 activation. *J Biol Chem*, **278**, 20915-20924.
- Reimold, A.M., Etkin, A., Clauss, I., Perkins, A., Friend, D.S., Zhang, J., Horton, H.F., Scott, A., Orkin, S.H., Byrne, M.C., Grusby, M.J. and Glimcher, L.H. (2000) An essential role in liver development for transcription factor XBP-1. *Genes Dev*, **14**, 152-157.
- Reimold, A.M., Iwakoshi, N.N., Manis, J., Vallabhajosyula, P., Szomolanyi-Tsuda, E., Gravalles, E.M., Friend, D., Grusby, M.J., Alt, F. and Glimcher, L.H. (2001) Plasma cell differentiation requires the transcription factor XBP-1. *Nature*, **412**, 300-307.
- Reynolds, D.M., Falk, C.T., Li, A., King, B.F., Kamath, P.S., Huston, J., 3rd, Shub, C., Iglesias, D.M., Martin, R.S., Pirson, Y., Torres, V.E. and Somlo, S. (2000) Identification of a locus for autosomal dominant polycystic liver disease, on chromosome 19p13.2-13.1. *Am J Hum Genet*, **67**, 1598-1604.
- Romero-Ramirez, L., Cao, H., Nelson, D., Hammond, E., Lee, A.H., Yoshida, H., Mori, K., Glimcher, L.H., Denko, N.C., Giaccia, A.J., Le, Q.T. and Koong, A.C. (2004) XBP1 is essential for survival under hypoxic conditions and is required for tumor growth. *Cancer Res*, **64**, 5943-5947.
- Ryu, E.J., Harding, H.P., Angelastro, J.M., Vitolo, O.V., Ron, D. and Greene, L.A. (2002) Endoplasmic reticulum stress and the unfolded protein response in cellular models of Parkinson's disease. *J Neurosci*, **22**, 10690-10698.
- Sai, X., Kawamura, Y., Kokame, K., Yamaguchi, H., Shiraishi, H., Suzuki, R., Suzuki, T., Kawaichi, M., Miyata, T., Kitamura, T., De Strooper, B., Yanagisawa, K. and Komano, H. (2002) Endoplasmic reticulum stress-inducible protein, Herp, enhances presenilin-mediated generation of amyloid beta-protein. *J Biol Chem*, **277**, 12915-12920.
- Satoh, M., Shimada, A., Keino, H., Kashiwai, A., Nagai, N., Saga, S. and Hosokawa, M. (2005) Functional characterization of 3 thioredoxin homology domains of ERp72. *Cell Stress Chaperones*, **10**, 278-284.
- Scherens, B., Dubois, E. and Messenguy, F. (1991) Determination of the sequence of the yeast YCL313 gene localized on chromosome III. Homology with the protein disulfide isomerase (PDI gene product) of other organisms. *Yeast*, **7**, 185-193.
- Scheuner, D., Song, B., McEwen, E., Liu, C., Laybutt, R., Gillespie, P., Saunders, T., Bonner-Weir, S. and Kaufman, R.J. (2001) Translational control is required for the unfolded protein response and in vivo glucose homeostasis. *Mol Cell*, **7**, 1165-1176.
- Schulmann, K., Brasch, F.E., Kunstmann, E., Engel, C., Pagenstecher, C., Vogelsang, H., Kruger, S., Vogel, T., Knaebel, H.P., Ruschoff, J., Hahn, S.A., Knebel-Doeberitz, M.V., Moeslein, G., Meltzer, S.J., Schackert, H.K., Tympner, C., Mangold, E. and Schmiegel, W. (2005) HNPCC-associated small bowel cancer: clinical and molecular characteristics. *Gastroenterology*, **128**, 590-599.
- Senderek, J., Krieger, M., Stendel, C., Bergmann, C., Moser, M., Breitbach-Faller, N., Rudnik-Schoneborn, S., Blaschek, A., Wolf, N.I., Harting, I., North, K., Smith, J., Muntoni, F., Brockington, M., Quijano-Roy, S., Renault, F., Herrmann, R., Hendershot, L.M., Schroder, J.M., Lochmuller, H., Topaloglu, H., Voit, T., Weis, J., Ebinger, F. and Zerres, K. (2005) Mutations in SIL1 cause Marinesco-Sjogren syndrome, a cerebellar ataxia with cataract and myopathy. *Nat Genet*, **37**, 1312-1314.
- Solda, T., Galli, C., Kaufman, R.J. and Molinari, M. (2007) Substrate-specific requirements for UGT1-dependent release from calnexin. *Mol Cell*, **27**, 238-249.
- Solda, T., Garbi, N., Hammerling, G.J. and Molinari, M. (2006) Consequences of ERp57 deletion on oxidative folding of obligate and facultative clients of the calnexin cycle. *J Biol Chem*, **281**, 6219-6226.
- Sun, F., Zhang, R., Gong, X., Geng, X., Drain, P.F. and Frizzell, R.A. (2006) Derlin-1 promotes the efficient degradation of the cystic fibrosis transmembrane conductance regulator (CFTR) and CFTR folding mutants. *J Biol Chem*, **281**, 36856-36863.
- Tan, S.L., Gale, M.J., Jr. and Katze, M.G. (1998) Double-stranded RNA-independent dimerization of interferon-induced protein kinase PKR and inhibition of dimerization by the cellular P58IPK inhibitor. *Mol Cell Biol*, **18**, 2431-2443.
- Thameem, F., Farook, V.S., Bogardus, C. and Prochazka, M. (2006) Association of amino acid variants in the activating transcription factor 6 gene (ATF6) on 1q21-q23 with type 2 diabetes in Pima Indians. *Diabetes*, **55**, 839-842.
- Turano, C., Coppari, S., Altieri, F. and Ferraro, A. (2002) Proteins of the PDI family: unpredicted non-ER locations and functions. *J Cell Physiol*, **193**, 154-163.

- Uehara, T., Nakamura, T., Yao, D., Shi, Z.Q., Gu, Z., Ma, Y., Masliah, E., Nomura, Y. and Lipton, S.A. (2006) S-nitrosylated protein-disulphide isomerase links protein misfolding to neurodegeneration. *Nature*, **441**, 513-517.
- Unterberger, U., Hoftberger, R., Gelpi, E., Flicker, H., Budka, H. and Voigtlander, T. (2006) Endoplasmic reticulum stress features are prominent in Alzheimer disease but not in prion diseases in vivo. *J Neuropathol Exp Neurol*, **65**, 348-357.
- Urano, F., Wang, X., Bertolotti, A., Zhang, Y., Chung, P., Harding, H.P. and Ron, D. (2000) Coupling of stress in the ER to activation of JNK protein kinases by transmembrane protein kinase IRE1. *Science*, **287**, 664-666.
- van Huizen, R., Martindale, J.L., Gorospe, M. and Holbrook, N.J. (2003) P58IPK, a novel endoplasmic reticulum stress-inducible protein and potential negative regulator of eIF2alpha signaling. *J Biol Chem*, **278**, 15558-15564.
- Volker, C., De Praeter, C.M., Hardt, B., Breuer, W., Kalz-Fuller, B., Van Coster, R.N. and Bause, E. (2002) Processing of N-linked carbohydrate chains in a patient with glucosidase I deficiency (CDG type IIb). *Glycobiology*, **12**, 473-483.
- Waanders, E., te Morsche, R.H., de Man, R.A., Jansen, J.B. and Drenth, J.P. (2006) Extensive mutational analysis of PRKCSH and SEC63 broadens the spectrum of polycystic liver disease. *Hum Mutat*, **27**, 830.
- Wang, Z.V., Schraw, T.D., Kim, J.Y., Khan, T., Rajala, M.W., Follenzi, A. and Scherer, P.E. (2007) Secretion of the adipocyte-specific secretory protein adiponectin critically depends on thiol-mediated protein retention. *Mol Cell Biol*, **27**, 3716-3731.
- Wen, X.Y., Stewart, A.K., Sooknanan, R.R., Henderson, G., Hawley, T.S., Reimold, A.M., Glimcher, L.H., Baumann, H., Malek, L.T. and Hawley, R.G. (1999) Identification of c-myc promoter-binding protein and X-box binding protein 1 as interleukin-6 target genes in human multiple myeloma cells. *Int J Oncol*, **15**, 173-178.
- Wu, J., Rutkowski, D.T., Dubois, M., Swathirajan, J., Saunders, T., Wang, J., Song, B., Yau, G.D. and Kaufman, R.J. (2007) ATF6alpha Optimizes Long-Term Endoplasmic Reticulum Function to Protect Cells from Chronic Stress. *Dev Cell*, **13**, 351-364.
- Yamasaki, S., Yagishita, N., Tsuchimochi, K., Nishioka, K. and Nakajima, T. (2005) Rheumatoid arthritis as a hyper-endoplasmic-reticulum-associated degradation disease. *Arthritis Res Ther*, **7**, 181-186.
- Yan, W., Frank, C.L., Korth, M.J., Sopher, B.L., Novoa, I., Ron, D. and Katze, M.G. (2002) Control of PERK eIF2alpha kinase activity by the endoplasmic reticulum stress-induced molecular chaperone P58IPK. *Proc Natl Acad Sci U S A*, **99**, 15920-15925.
- Yoshida, H., Haze, K., Yanagi, H., Yura, T. and Mori, K. (1998) Identification of the cis-acting endoplasmic reticulum stress response element responsible for transcriptional induction of mammalian glucose-regulated proteins. Involvement of basic leucine zipper transcription factors. *J Biol Chem*, **273**, 33741-33749.
- Zhang, C., Cai, Y., Adachi, M.T., Oshiro, S., Aso, T., Kaufman, R.J. and Kitajima, S. (2001) Homocysteine induces programmed cell death in human vascular endothelial cells through activation of the unfolded protein response. *J Biol Chem*, **276**, 35867-35874.
- Zhao, L., Longo-Guess, C., Harris, B.S., Lee, J.W. and Ackerman, S.L. (2005) Protein accumulation and neurodegeneration in the woozy mutant mouse is caused by disruption of SIL1, a cochaperone of BiP. *Nat Genet*, **37**, 974-979.
- Zoghbi, H.Y. (2005) SiLencing misbehaving proteins. *Nat Genet*, **37**, 1302-1303.
